# Supplementary material for: Sulfisoxazole does not inhibit the secretion of small extracellular vesicles
Source: PubMed Central journal article supplement (PMC7881022; doi:10.1038/s41467-021-21074-x), 2021-02-12

# Full blots for Figure 2

**d**

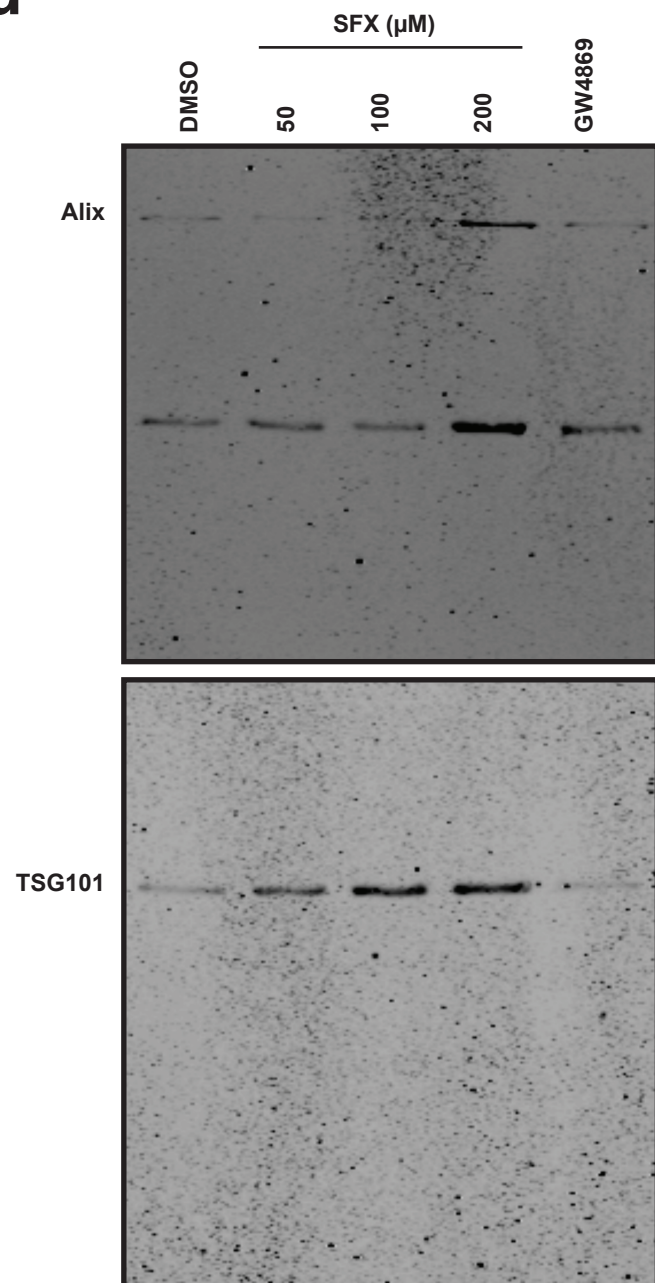

**e**

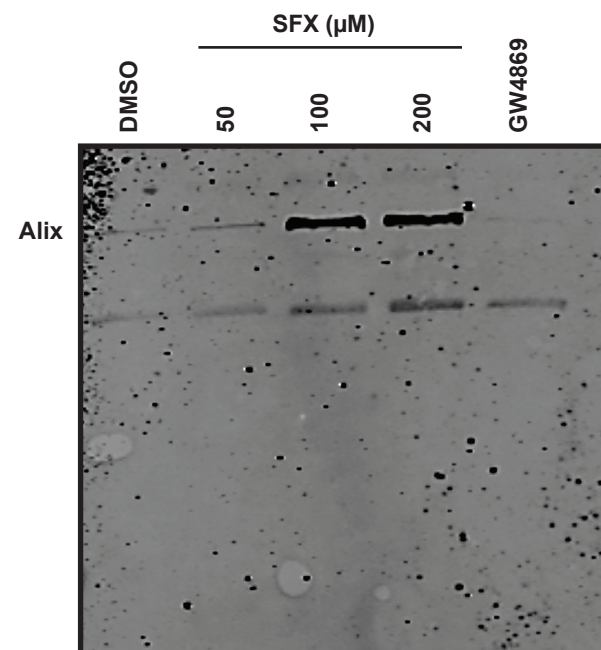

Supplement: 41467_2021_21074_MOESM1_ESM.pdf [file 41467_2021_21074_MOESM1_ESM.pdf]
